# Supplementary material for: Aminotransferase SsAro8 Regulates Tryptophan Metabolism Essential for Filamentous Growth of Sugarcane Smut Fungus Sporisorium scitamineum
Source: PubMed Central journal article supplement (PMC9431617; doi:10.1128/spectrum.00570-22), 2022-07-06
Supplement: spectrum.00570-22-s0001.pdf [file spectrum.00570-22-s0001.pdf]

# Figure S1

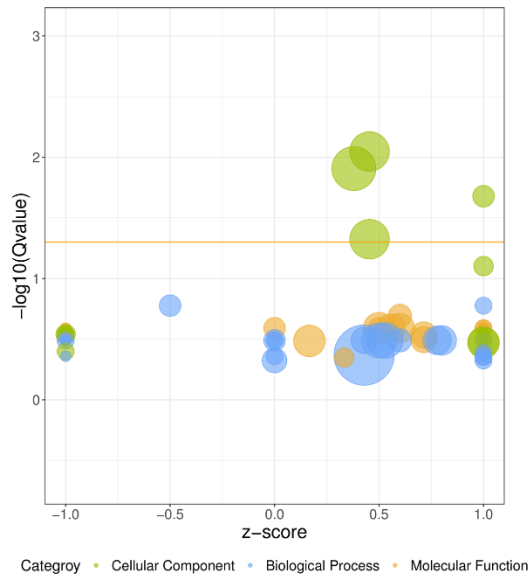

## GO term Top 20

| ID         | Description                                                                                       |
|------------|---------------------------------------------------------------------------------------------------|
| GO:0009457 | protein folding                                                                                   |
| GO:0006829 | zinc II ion transport                                                                             |
| GO:0031224 | intrinsic component of membrane                                                                   |
| GO:0016020 | membrane                                                                                          |
| GO:0005730 | nucleolus                                                                                         |
| GO:0044425 | membrane part                                                                                     |
| GO:0044452 | nucleolar part                                                                                    |
| GO:0048037 | cofactor binding                                                                                  |
| GO:0050662 | coenzyme binding                                                                                  |
| GO:0005215 | transporter activity                                                                              |
| GO:0015103 | inorganic anion transmembrane transporter activity                                                |
| GO:0022857 | transmembrane transporter activity                                                                |
| GO:0046906 | tetrapyrrole binding                                                                              |
| GO:0022892 | substrate-specific transporter activity                                                           |
| GO:0008509 | anion transmembrane transporter activity                                                          |
| GO:0009881 | photoreceptor activity                                                                            |
| GO:0016679 | oxidoreductase activity, acting on diphenols and related substances as donors                     |
| GO:0016682 | oxidoreductase activity, acting on diphenols and related substances as donors, oxygen as acceptor |
| GO:0044620 | ACP phosphopantetheine attachment site binding                                                    |
| GO:0051192 | prosthetic group binding                                                                          |

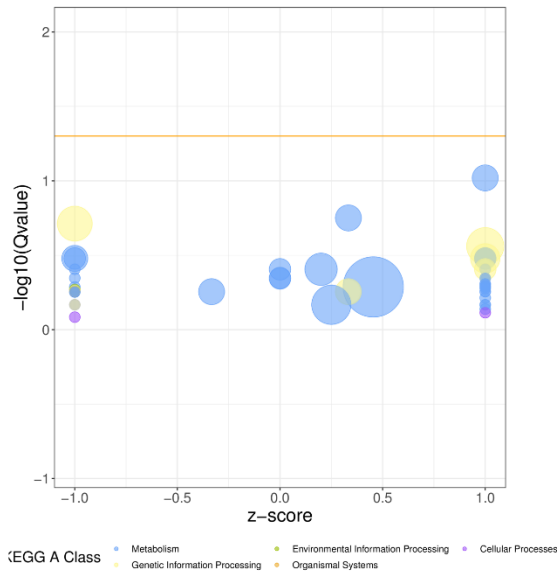

## Pathway Top 20

| ID      | Description                                         |
|---------|-----------------------------------------------------|
| ko00910 | Nitrogen metabolism                                 |
| ko00360 | Phenylalanine metabolism                            |
| ko00130 | Ubiquinone and other terpenoid-quinone biosynthesis |
| ko00290 | Valine, leucine and isoleucine biosynthesis         |
| ko00400 | Phenylalanine, tyrosine and tryptophan biosynthesis |
| ko00260 | Glycine, serine and threonine metabolism            |
| ko00790 | Folate biosynthesis                                 |
| ko00261 | Monobactam biosynthesis                             |
| ko00350 | Tyrosine metabolism                                 |
| ko01230 | Biosynthesis of amino acids                         |
| ko00073 | Cutin, suberine and wax biosynthesis                |
| ko01212 | Fatty acid metabolism                               |
| ko00061 | Fatty acid biosynthesis                             |
| ko00592 | alpha-Linolenic acid metabolism                     |
| ko00071 | Fatty acid degradation                              |
| ko04141 | Protein processing in endoplasmic reticulum         |
| ko03010 | Ribosome                                            |
| ko03008 | Ribosome biogenesis in eukaryotes                   |
| ko03020 | RNA polymerase                                      |
| ko04122 | Sulfur relay system                                 |

**Figure S1** GO and KEGG enrichment of DEGs responsive to PheOH.

# Figure S2

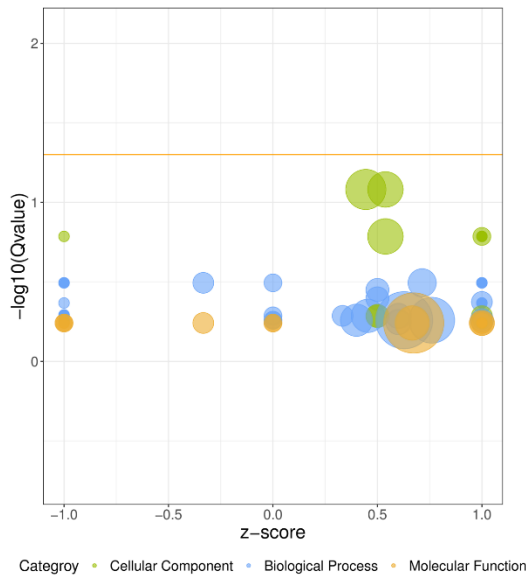

GO term Top 20

| ID         | Description                                                           |
|------------|-----------------------------------------------------------------------|
| GO:0006457 | protein folding                                                       |
| GO:0006997 | nucleus organization                                                  |
| GO:0006359 | regulation of transcription from RNA polymerase III promoter          |
| GO:0006998 | nuclear envelope organization                                         |
| GO:0016480 | negative regulation of transcription from RNA polymerase III promoter |
| GO:0019630 | quininate metabolic process                                           |
| GO:0030522 | intracellular receptor signaling pathway                              |
| GO:0016020 | membrane                                                              |
| GO:0031224 | intrinsic component of membrane                                       |
| GO:0044425 | membrane part                                                         |
| GO:0005788 | endoplasmic reticulum lumen                                           |
| GO:0005730 | nucleolus                                                             |
| GO:0005635 | nuclear envelope                                                      |
| GO:0005637 | nuclear inner membrane                                                |
| GO:0017053 | transcriptional repressor complex                                     |
| GO:0031229 | intrinsic component of nuclear inner membrane                         |
| GO:0031965 | nuclear membrane                                                      |
| GO:0044453 | nuclear membrane part                                                 |
| GO:0090568 | nuclear transcriptional repressor complex                             |
| GO:0090571 | RNA polymerase II transcription repressor complex                     |

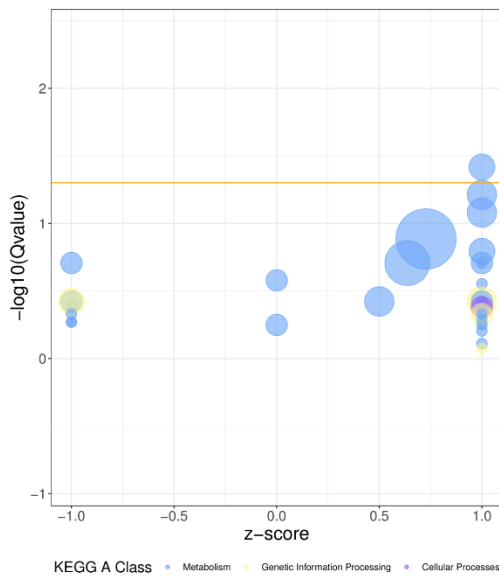

Pathway Top 20

| ID      | Description                                 |
|---------|---------------------------------------------|
| ko00910 | Nitrogen metabolism                         |
| ko00071 | Fatty acid degradation                      |
| ko00280 | Valine, leucine and isoleucine degradation  |
| ko01100 | Metabolic pathways                          |
| ko01212 | Fatty acid metabolism                       |
| ko00232 | Caffeine metabolism                         |
| ko00360 | Phenylalanine metabolism                    |
| ko00790 | Folate biosynthesis                         |
| ko01110 | Biosynthesis of secondary metabolites       |
| ko00350 | Tyrosine metabolism                         |
| ko00261 | Monobactam biosynthesis                     |
| ko01230 | Biosynthesis of amino acids                 |
| ko00460 | Cyanoamino acid metabolism                  |
| ko00592 | alpha-Linolenic acid metabolism             |
| ko00260 | Glycine, serine and threonine metabolism    |
| ko00520 | Amino sugar and nucleotide sugar metabolism |
| ko00300 | Lysine biosynthesis                         |
| ko04122 | Sulfur relay system                         |
| ko03010 | Ribosome                                    |
| ko04141 | Protein processing in endoplasmic reticulum |

Figure S2 GO and KEGG enrichment of DEGs responsive to TyrOH.

# Figure S3

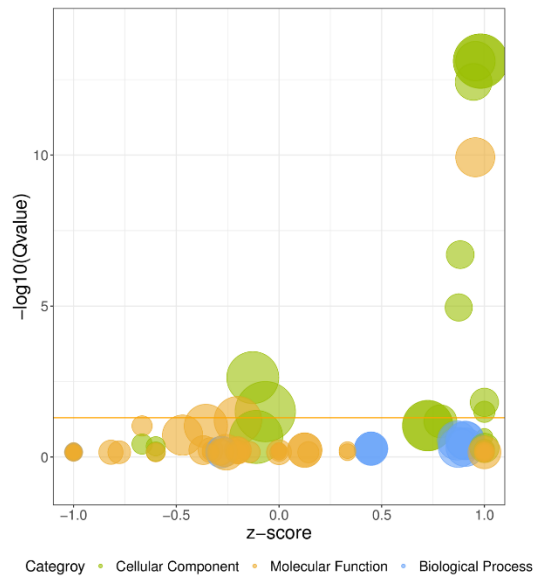

## GO term Top 20

| ID         | Description                                                                             |
|------------|-----------------------------------------------------------------------------------------|
| GO:0005840 | ribosome                                                                                |
| GO:0030529 | intracellular ribonucleoprotein complex                                                 |
| GO:1990904 | ribonucleoprotein complex                                                               |
| GO:0044391 | ribosomal subunit                                                                       |
| GO:0015935 | small ribosomal subunit                                                                 |
| GO:0015934 | large ribosomal subunit                                                                 |
| GO:0031224 | intrinsic component of membrane                                                         |
| GO:0030684 | pre-ribosome                                                                            |
| GO:0016020 | membrane                                                                                |
| GO:0000313 | organellar ribosome                                                                     |
| GO:0005739 | mitochondrion                                                                           |
| GO:0043228 | non-membrane-bounded organelle                                                          |
| GO:0043232 | intracellular non-membrane-bounded organelle                                            |
| GO:0000314 | organellar small ribosomal subunit                                                      |
| GO:0044425 | membrane part                                                                           |
| GO:0005198 | structural molecule activity                                                            |
| GO:0016491 | oxidoreductase activity                                                                 |
| GO:0016701 | oxidoreductase activity, acting on single donors with incorporation of molecular oxygen |
| GO:0005215 | transporter activity                                                                    |
| GO:0022857 | transmembrane transporter activity                                                      |

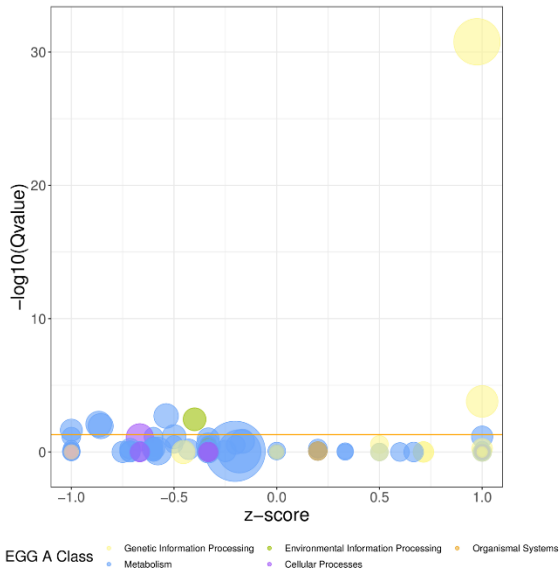

## Pathway Top 20

| ID      | Description                                |
|---------|--------------------------------------------|
| ko00410 | beta-Alanine metabolism                    |
| ko00071 | Fatty acid degradation                     |
| ko01212 | Fatty acid metabolism                      |
| ko00360 | Phenylalanine metabolism                   |
| ko00860 | Porphyrin and chlorophyll metabolism       |
| ko00380 | Tryptophan metabolism                      |
| ko00061 | Fatty acid biosynthesis                    |
| ko00430 | Taurine and hypotaurine metabolism         |
| ko00350 | Tyrosine metabolism                        |
| ko00620 | Pyruvate metabolism                        |
| ko00460 | Cyanoamino acid metabolism                 |
| ko00073 | Cutin, suberine and wax biosynthesis       |
| ko00590 | Arachidonic acid metabolism                |
| ko00053 | Ascorbate and aldarate metabolism          |
| ko00280 | Valine, leucine and isoleucine degradation |
| ko02010 | ABC transporters                           |
| ko04146 | Peroxisome                                 |
| ko03010 | Ribosome                                   |
| ko03008 | Ribosome biogenesis in eukaryotes          |
| ko04122 | Sulfur relay system                        |

**Figure S3** GO and KEGG enrichment of DEGs responsive to TryOH.



**Figure S5**

LONGEVITY REGULATING PATHWAY - MULTIPLE SPECIES

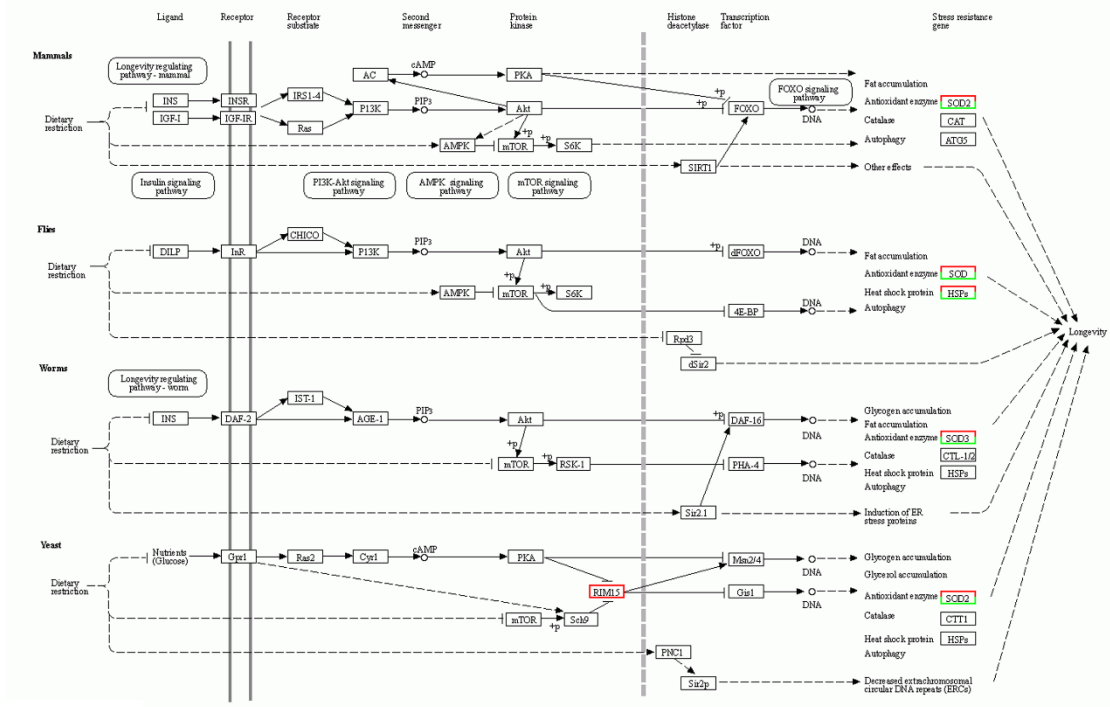

**Figure S5** KEGG map of the AGC (Rim15) signaling pathway in response to TryOH treatment. Red and green boxes denote up- and down- regulated genes, respectively, in TryOH-treated vs un-treated sporidia.

**Figure S6**

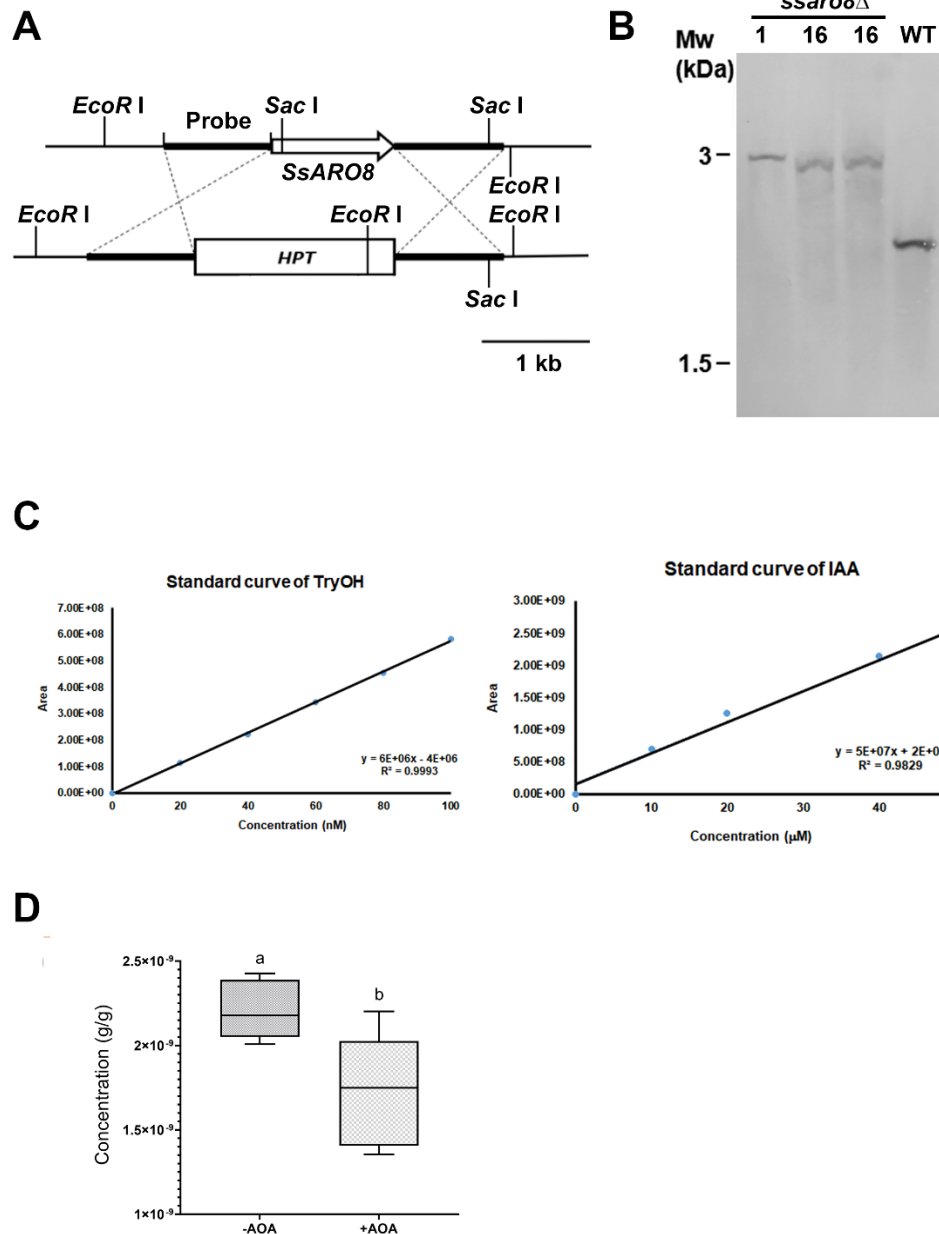

**Figure S6** (A) Schematic representation of gene deletion strategy. Dashed lines denote homologous recombination occurring in the flanking regions of *SsARO8* coding sequence, resulting in replacement of hygromycin phosphotransferase cassette (*HPT*) in the genome. The restriction enzyme sites and the DNA fragment used as probe for Southern blotting analysis were labeled in the scheme. Scale bar = 1 kb. (B) Southern blotting analysis for verification of *ssaro8*Δ mutants. Detection of a single band of approximately 3 kb, and concomitantly disappearance of the wild-type band (1.6 kb)

was diagnostic as the *ssaro8Δ* mutants. (C) Standard curve of TryOH and IAA using serial diluted TryOH (Sigma, 188255) or IAA (Sigma, I2886) solution. (D) Intracellular level of IAA in the WT sporidia under un-treated (-AOA) or AOA-treated (+AOA) condition was detected by LC-MS, and calculated based on the standard curve as in (C). Different letters denote significant difference ( $p < 0.05$ ).  $n=8$  for each condition, over two biological repeats.

## Figure S7

**A**

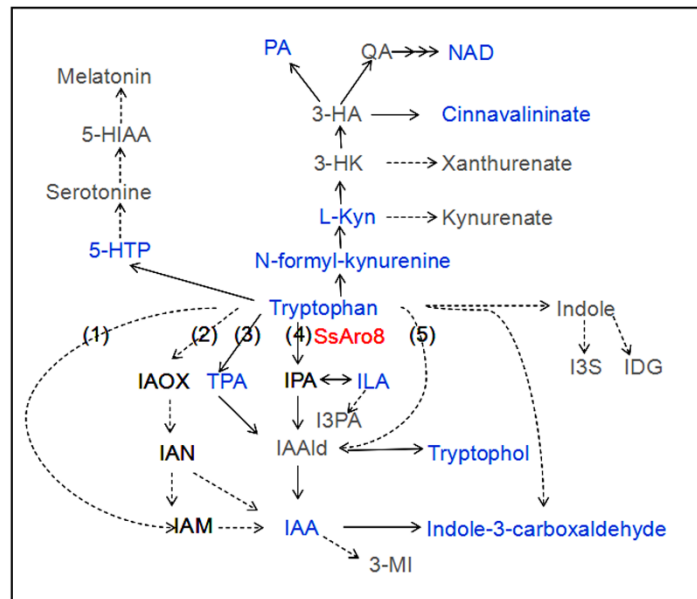

**B**

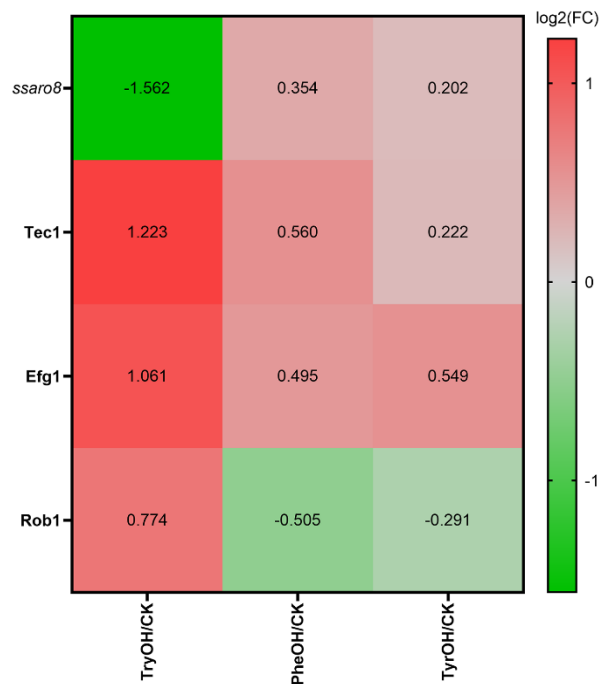

**Figure S7 (A)** Proposed tryptophan catabolism pathways in *S. scitamineum* based on targeted metabolomics analysis. Trp-dependent IAA biosynthesis pathways include: (1) IAM; (2) IAN; (3) TPA; (4) IPA; (5) TSO pathway. Presence of pathways (solid lines) was inferred based on detection of the intermediate metabolites (blue font), while



undetectable metabolites (grey font) indicate that the corresponding pathways may not be existed (dashed line). IAOX, IAN, IAM, and IPA (black font) were not assessed due to technical limits, so that we could not conclude whether the corresponding biosynthesis pathways exist in *S. scitamineum*. SsAro8 may catalyze Trp to IPA conversion based on comparison between wild-type and *ssaro8*Δ sporidia in terms of TryOH and IAA contents. (B) Heatmap depicting differentially expression of selected genes encoding the known biofilm formation regulators under aromatic alcohol treatment conditions. Scale bar represents log<sub>2</sub>FC values.

TRYPTOPHAN METABOLISM

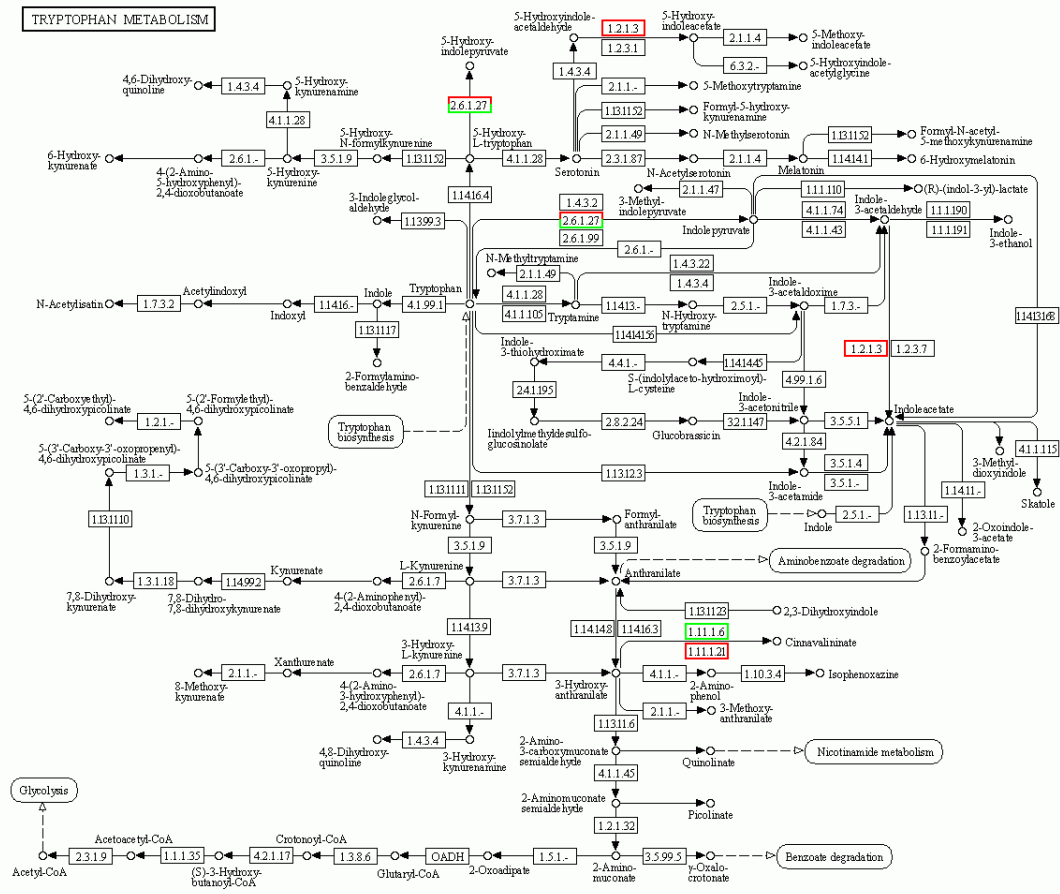

00380 1/9/20  
© Kanelias Laboratories

**Figure S8** KEGG map of tryptophan metabolism pathway differentially regulated in the *ssaro* $\delta$  $\Delta$  mating culture in comparison to WT mating culture. Red and green boxes denote up- and down- regulated genes, respectively.

**Table S1** Primers used in this study.

| Name            | Sequence (5'→3')                           | Description                                 |
|-----------------|--------------------------------------------|---------------------------------------------|
| SsARO8-UP-F     | 5'-AGATGAGGGCAGGCGAAGGTTGGT-3'             |                                             |
| SsARO8-UP-R     | 5'-TCAGCAAGATCTGCGCAAGTGTCGGTAGCCTTTGGA-3' |                                             |
| SsARO8P2-UP-F   | 5'-CGACACTTGCGCAGATCTTGCTGATAGGCAGG-3'     | PCR amplification for fused fragment        |
| SsARO8P2-DOWN-R | 5'-GCATCAGTTACATAATTCGGGGGATCTGGAT-3'      | used for targeted deletion of <i>SsARO8</i> |
| SsARO8-DOWN-F   | 5'-TCCCCCGAATTATGTAAGTGCAGCTGGCGAATT-3'    | gene                                        |
| SsARO8-DOWN-R   | 5'-ATCAAGTCTTTGGTGACGCAGCCTCGC-3'          |                                             |
| HPT-R           | 5'-GGTCAAGACCAATGCGGAGC-3'                 |                                             |
| HPT-F           | 5'-GCTGCGGCCGATCTTAGCCA-3'                 |                                             |
| SsARO8-TG-RBF-F | 5'-TTCCGGATCCGTCTCCCACT-3'                 | PCR verification of <i>SsARO8</i> deletion  |
| SsARO8-TG-RBF-R | 5'-TCTTAACCAGCCATCACCAC-3'                 |                                             |
| SsARO8-PROBE-F  | 5'-TGTAAGTGCAGCTGGCGAATT-3'                | PCR amplification for probe used in         |
| SsARO8-PROBE-R  | 5'-ATCAAGTCTTTGGTGACGCAGCCTCGC-3'          | Southern blotting analysis                  |
